# Supplementary material for: Three New Cytotoxic Polyhydroxysteroidal Glycosides from Starfish Craspidaster hesperus
Source: PubMed Central journal article supplement (PMC5082337; doi:10.3390/md14100189), 2016-10-19
Supplement: marinedrugs-14-00189-s001.pdf [file marinedrugs-14-00189-s001.pdf]

# Supplementary Materials: Three New Cytotoxic Polyhydroxysteroidal Glycosides from the Starfish *Craspidaster hesperus*

Jun-Xia Kang, Ying-Feng Kang and Hua Han

| List of Supporting Information                                                                            | Page |
|-----------------------------------------------------------------------------------------------------------|------|
| Figure S1. IR spectrum of hesperuside A (1)                                                               | S2   |
| Figure S2. <sup>13</sup> C NMR spectrum of hesperuside A (1) in pyridine- <i>d</i> <sub>5</sub> , 150MHz  | S2   |
| Figure S3. <sup>1</sup> H NMR spectrum of hesperuside A (1) in pyridine- <i>d</i> <sub>5</sub> , 600MHz   | S3   |
| Figure S4. HMQC spectrum of hesperuside A (1)                                                             | S3   |
| Figure S5. <sup>1</sup> H- <sup>1</sup> H COSY spectrum of hesperuside A (1)                              | S4   |
| Figure S6. HMBC spectrum of hesperuside A (1)                                                             | S4   |
| Figure S7. NOESY spectrum of hesperuside A (1)                                                            | S5   |
| Figure S8. TOCSY spectrum of hesperuside A (1)                                                            | S5   |
| Figure S9. EI-MS spectrum of hesperuside A (1)                                                            | S6   |
| Figure S10. HR-EI-MS spectrum of hesperuside A (1)                                                        | S6   |
| Figure S11. IR spectrum of hesperuside B (2)                                                              | S7   |
| Figure S12. <sup>1</sup> H NMR spectrum of hesperuside B (2) in pyridine- <i>d</i> <sub>5</sub> , 600MHz  | S7   |
| Figure S13. <sup>13</sup> C NMR spectrum of hesperuside B (2) in pyridine- <i>d</i> <sub>5</sub> , 150MHz | S8   |
| Figure S14. HMQC spectrum of hesperuside B (2)                                                            | S8   |
| Figure S15. <sup>1</sup> H- <sup>1</sup> H COSY spectrum of hesperuside B (2)                             | S9   |
| Figure S16. HMBC spectrum of hesperuside B (2)                                                            | S9   |
| Figure S17. NOESY spectrum of hesperuside B (2)                                                           | S10  |
| Figure S18. TOCSY spectrum of hesperuside B (2)                                                           | S10  |
| Figure S19. EI-MS spectrum of hesperuside B (2)                                                           | S11  |
| Figure S20. HR-EI-MS spectrum of hesperuside B (2)                                                        | S11  |
| Figure S21. <sup>1</sup> H NMR spectrum of hesperuside C (3) in pyridine- <i>d</i> <sub>5</sub> , 600MHz  | S12  |
| Figure S22. <sup>13</sup> C NMR spectrum of hesperuside C (3) in pyridine- <i>d</i> <sub>5</sub> , 150MHz | S12  |
| Figure S23. DEPT spectrum of hesperuside C (3)                                                            | S13  |
| Figure S24. HMQC spectrum of hesperuside C (3)                                                            | S13  |
| Figure S25. <sup>1</sup> H- <sup>1</sup> H COSY spectrum of hesperuside C (3)                             | S14  |
| Figure S26. HMBC spectrum of hesperuside C (3)                                                            | S14  |
| Figure S27. EI-MS spectrum of hesperuside C (3)                                                           | S15  |

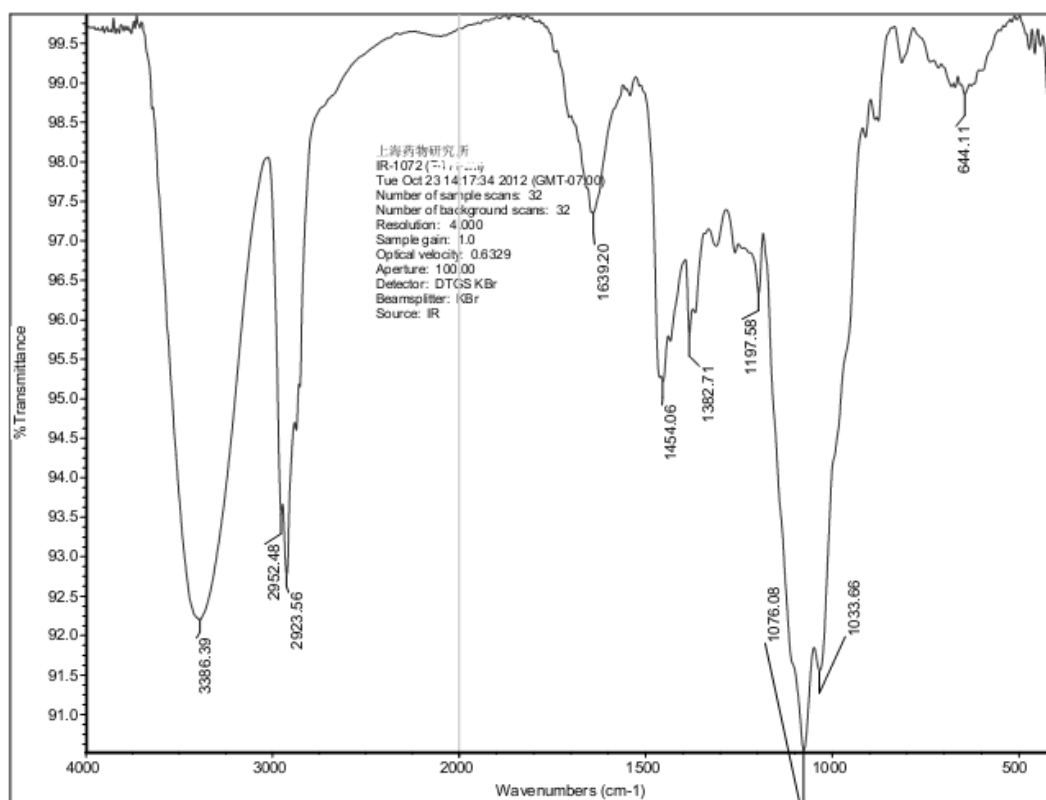

Figure S1. IR spectrum of hesperuside A (1).

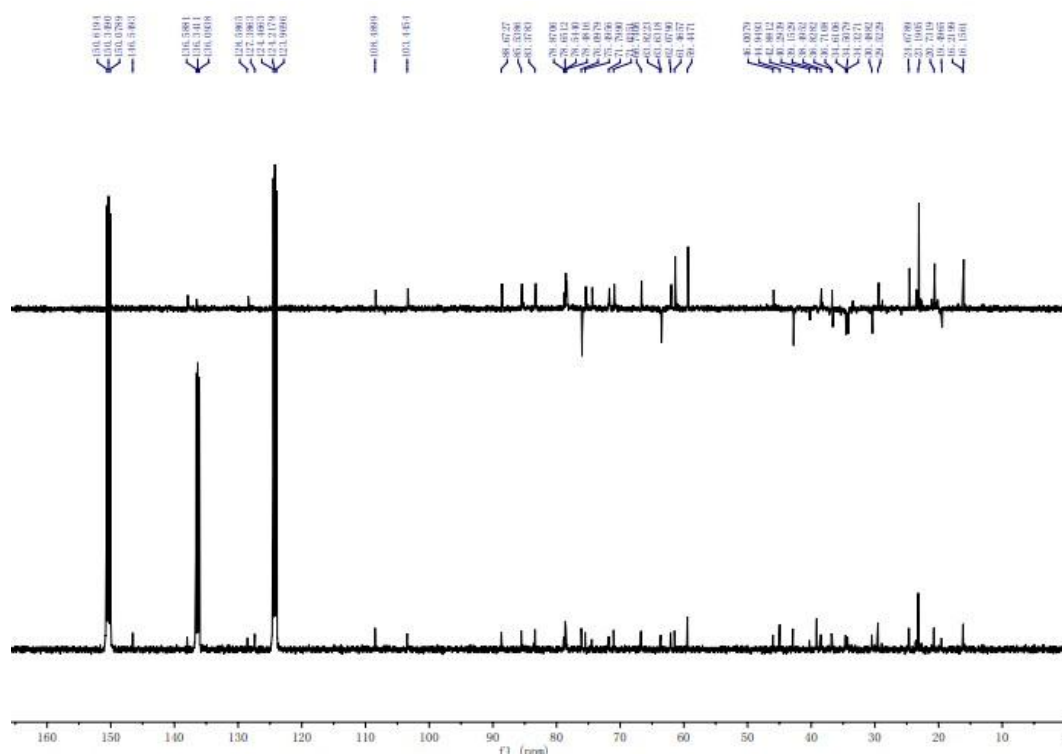Figure S2.  $^{13}\text{C}$  NMR and DEPT spectrum of hesperuside A (1) in pyridine- $d_5$ , 150MHz.

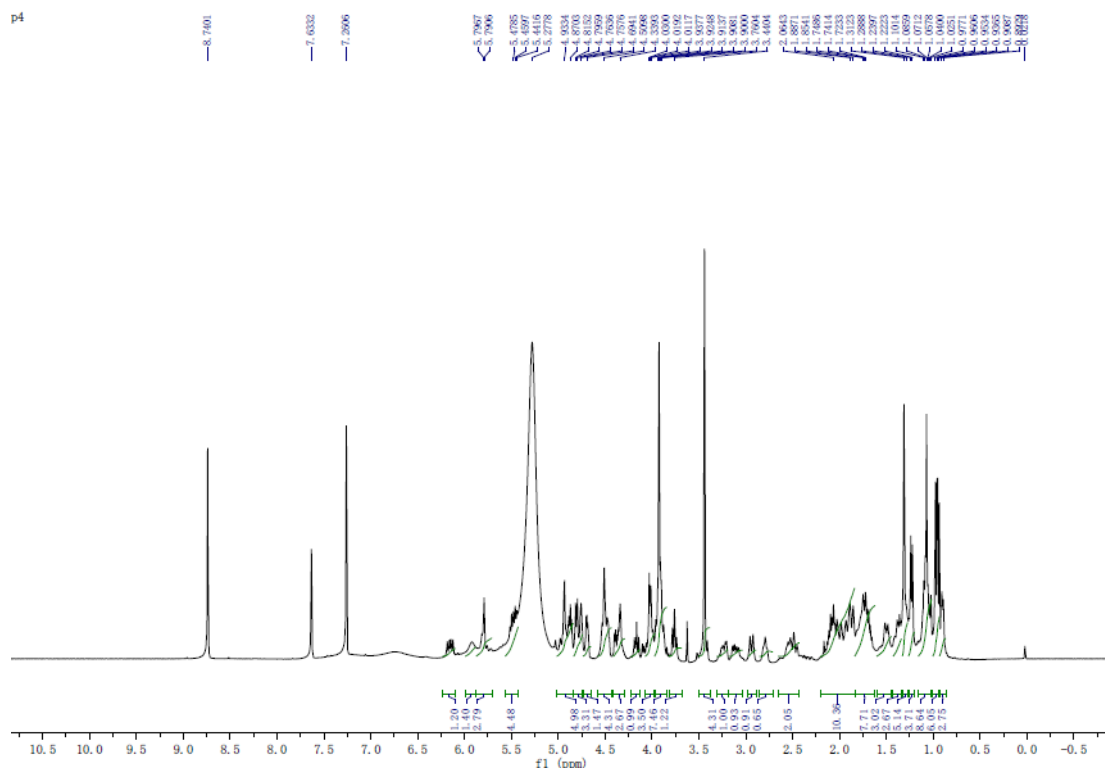

Figure S3. <sup>1</sup>H NMR spectrum of hesperuside A (1) in pyridine-*d*<sub>5</sub>, 600MHz.

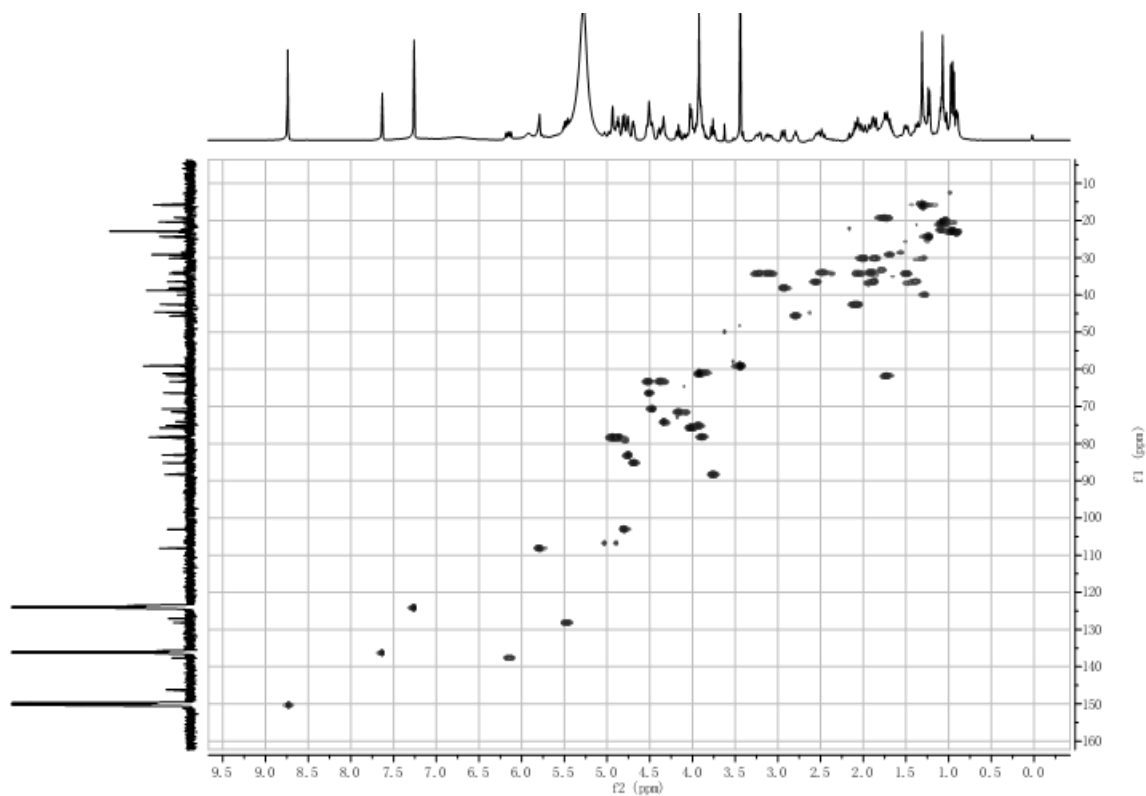

Figure S4. HMQC spectrum of hesperuside A (1).

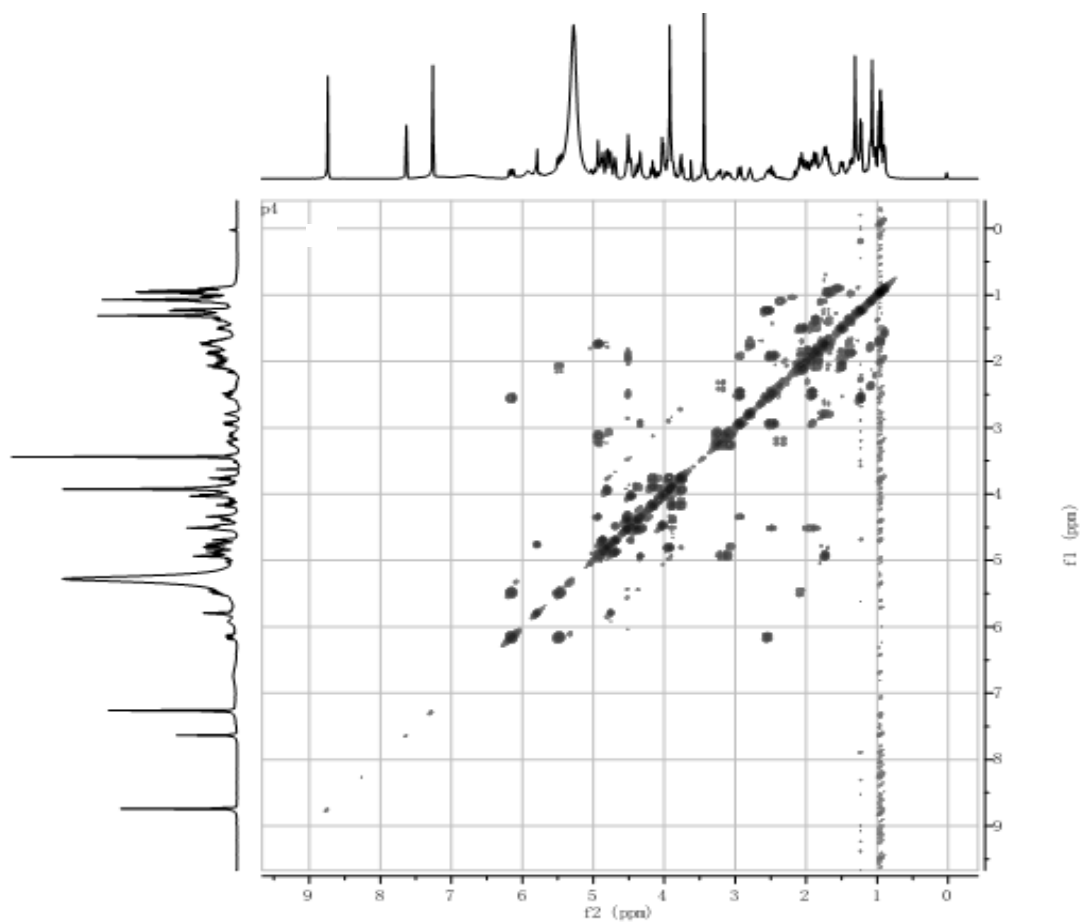

Figure S5.  $^1\text{H}$ - $^1\text{H}$  COSY spectrum of hesperuside A (1).

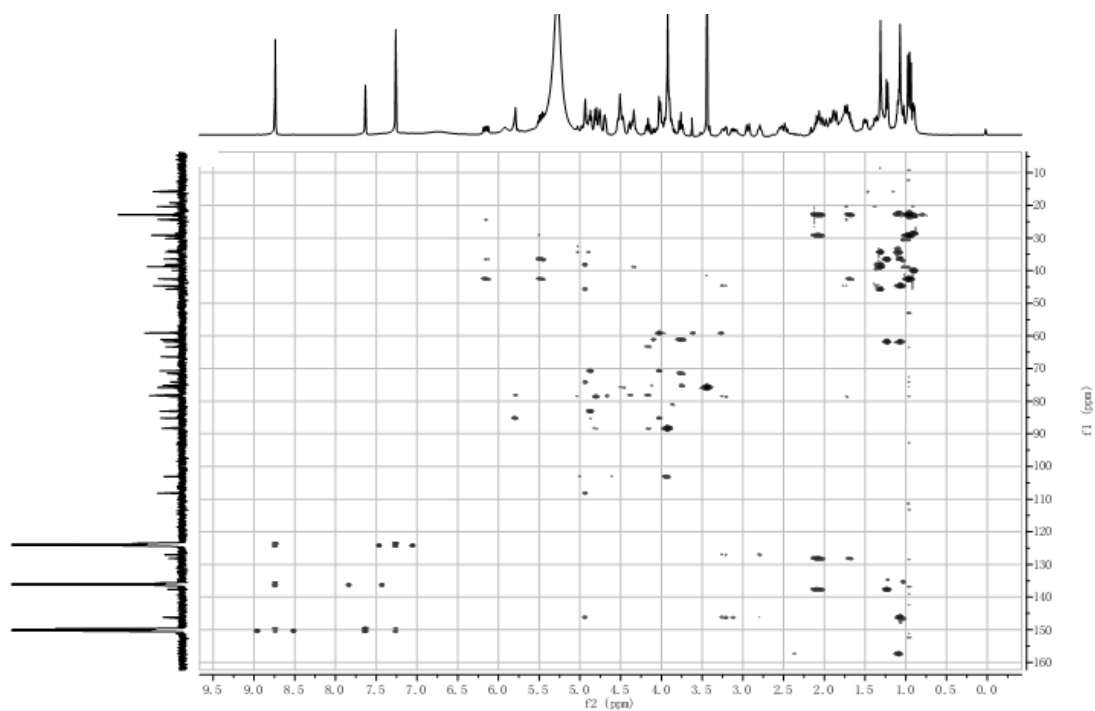

Figure S6. HMBC spectrum of hesperuside A (1).

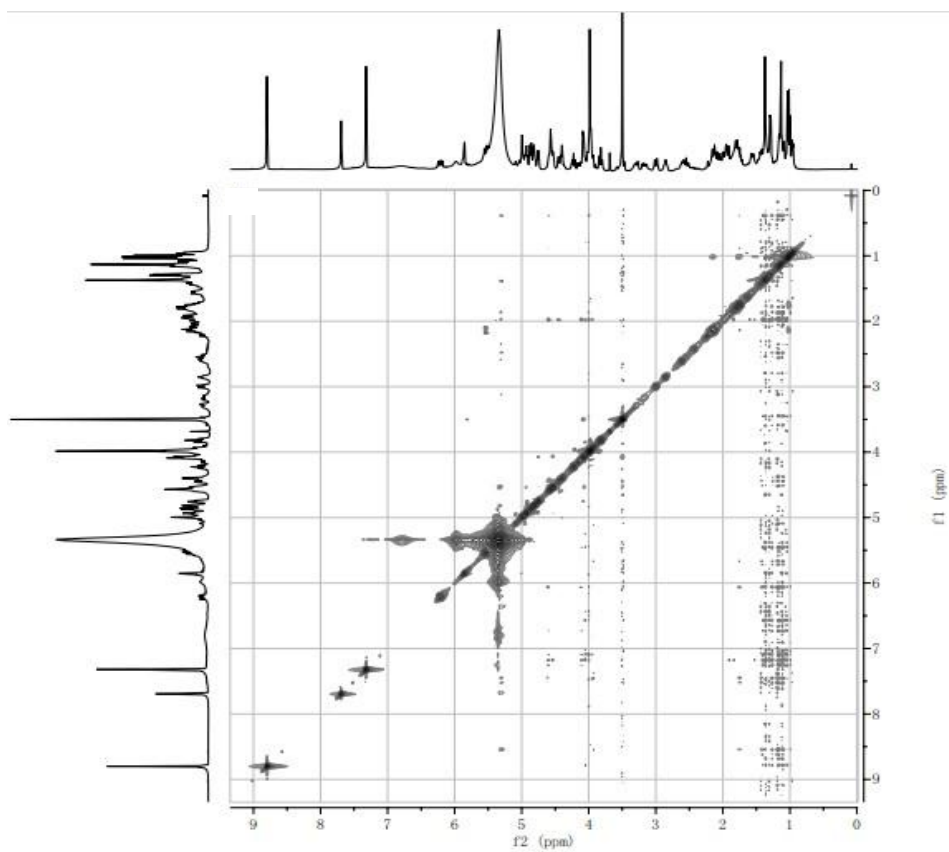

Figure S7. NOESY spectrum of hesperuside A (1).

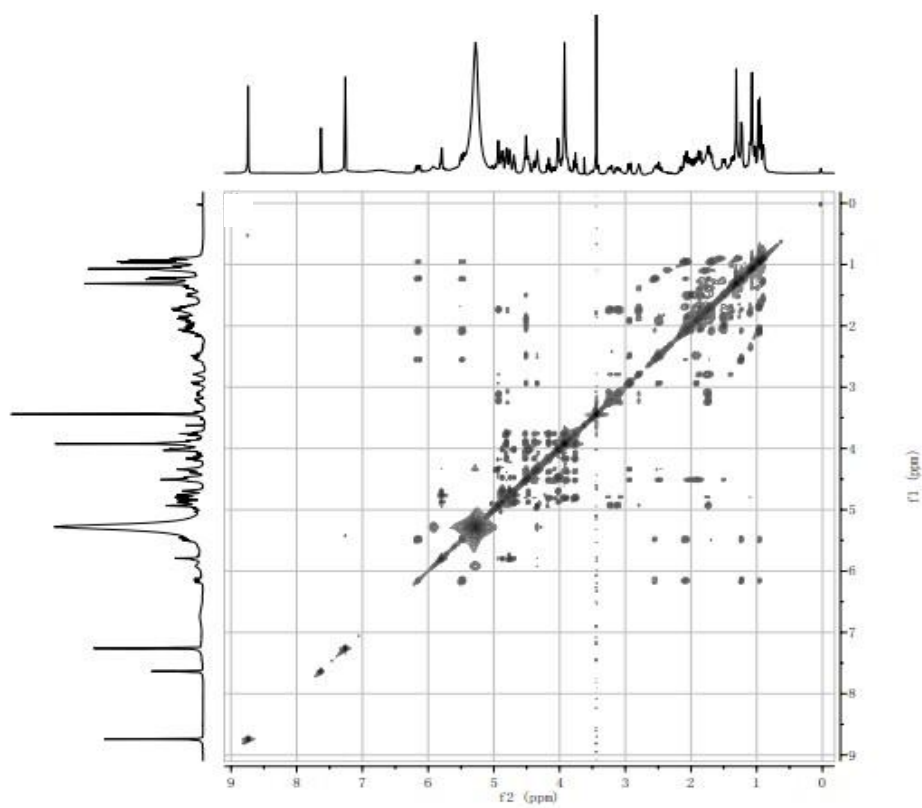

Figure S8. TOCSY spectrum of hesperuside A (1).

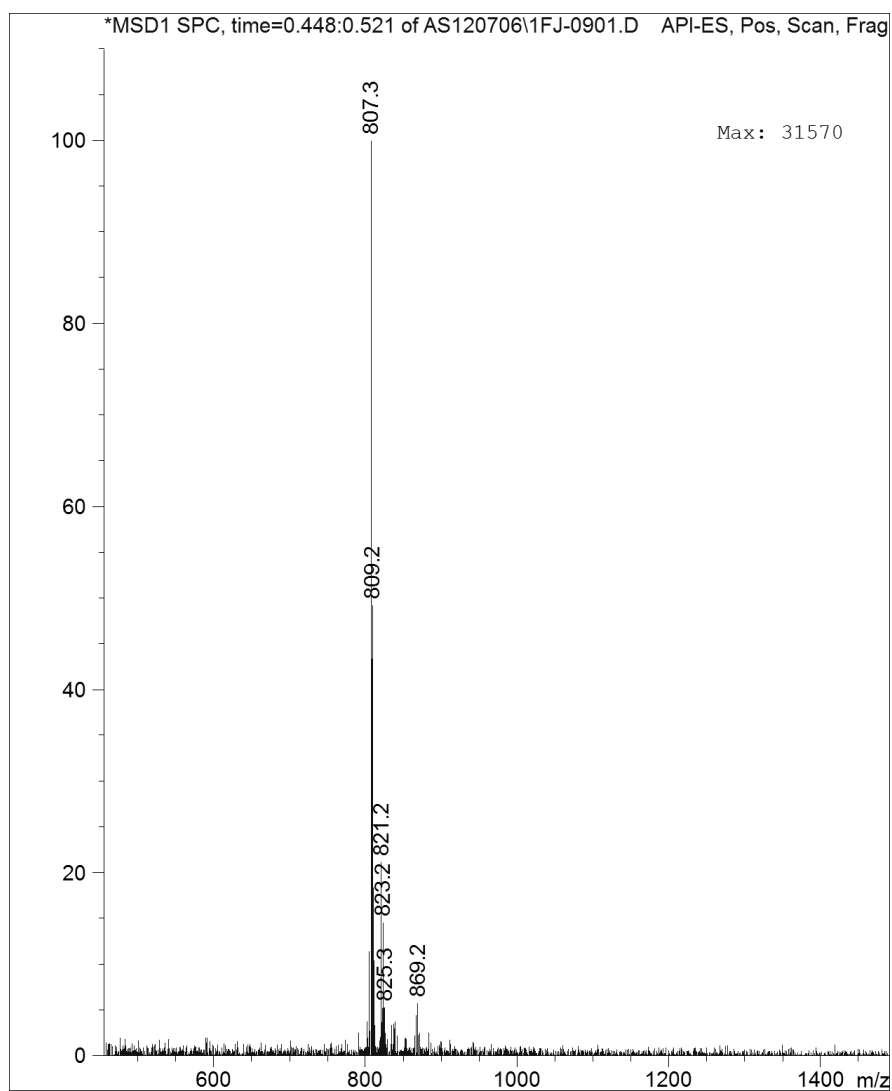

Figure S9. EI-MS spectrum of hesperuside A (1).

Ion Mass (Measured) 807.45341

| Sum Formula                                                                    | Sigma | m/z       | Err [ppm] | Mean Err [ppm] | Err [mDa] | rdb   | N Rule | e <sup>-</sup> |
|--------------------------------------------------------------------------------|-------|-----------|-----------|----------------|-----------|-------|--------|----------------|
| C <sub>44</sub> H <sub>66</sub> N <sub>1</sub> Na <sub>1</sub> O <sub>11</sub> | 0.088 | 807.45281 | -0.75     | -1.70          | -0.81     | 12.00 | ok     | odd            |
| C <sub>41</sub> H <sub>68</sub> Na <sub>1</sub> O <sub>14</sub>                | 0.091 | 807.45013 | -4.07     | -5.62          | -3.29     | 7.50  | ok     | even           |

Figure S10. HR-EI-MS spectrum of hesperuside A (1).

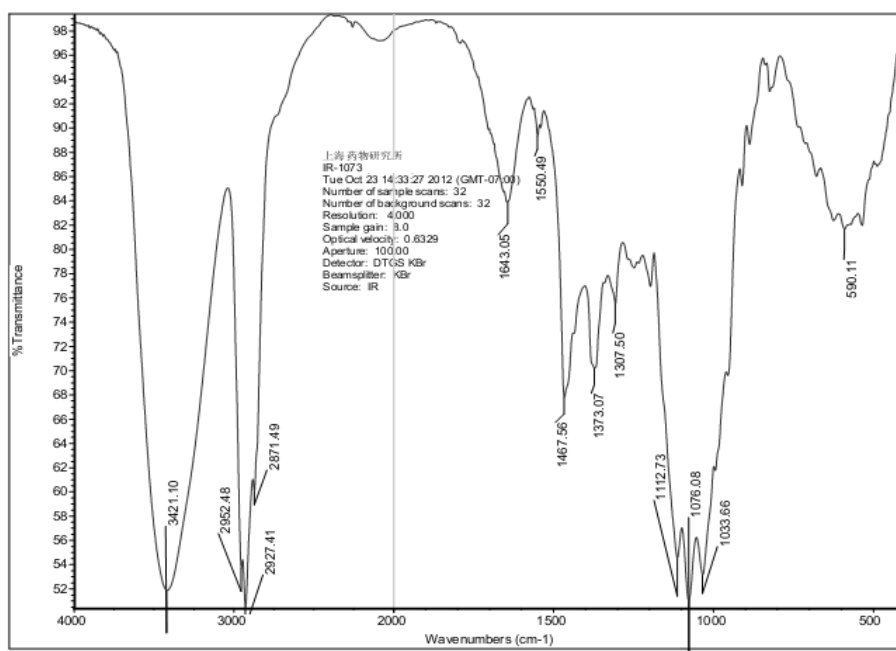

Figure S11. IR spectrum of hesperuside B (2).

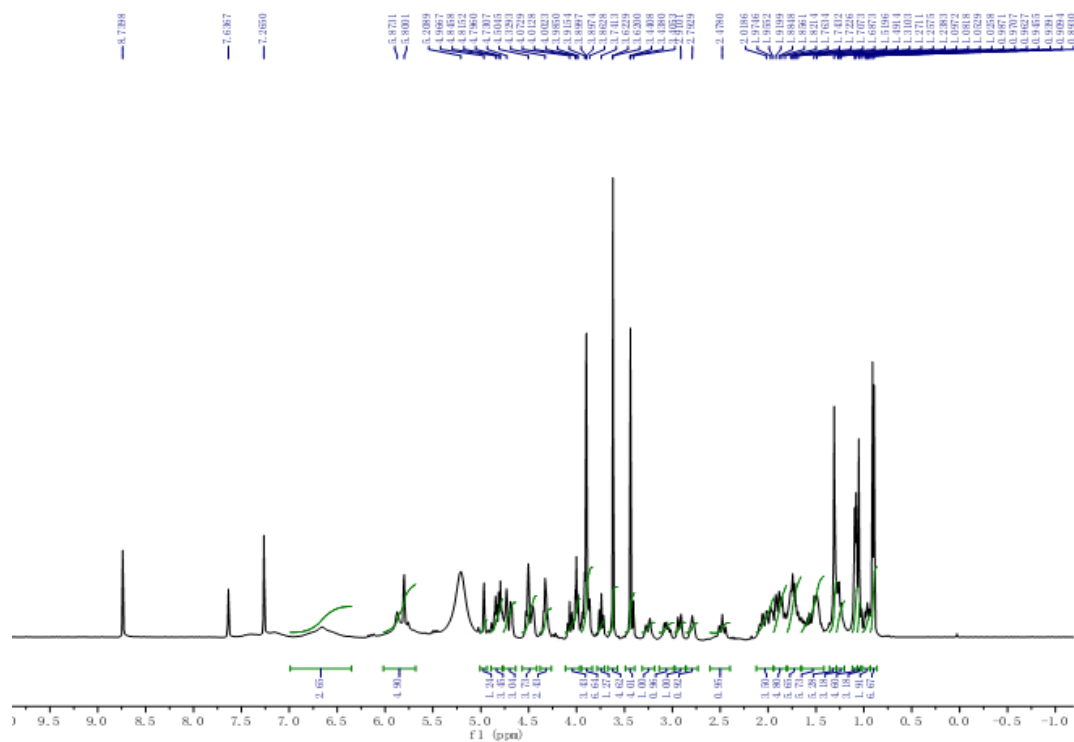Figure S12.  $^1\text{H}$  NMR spectrum of hesperuside B (2) in pyridine- $d_5$ , 600MHz.

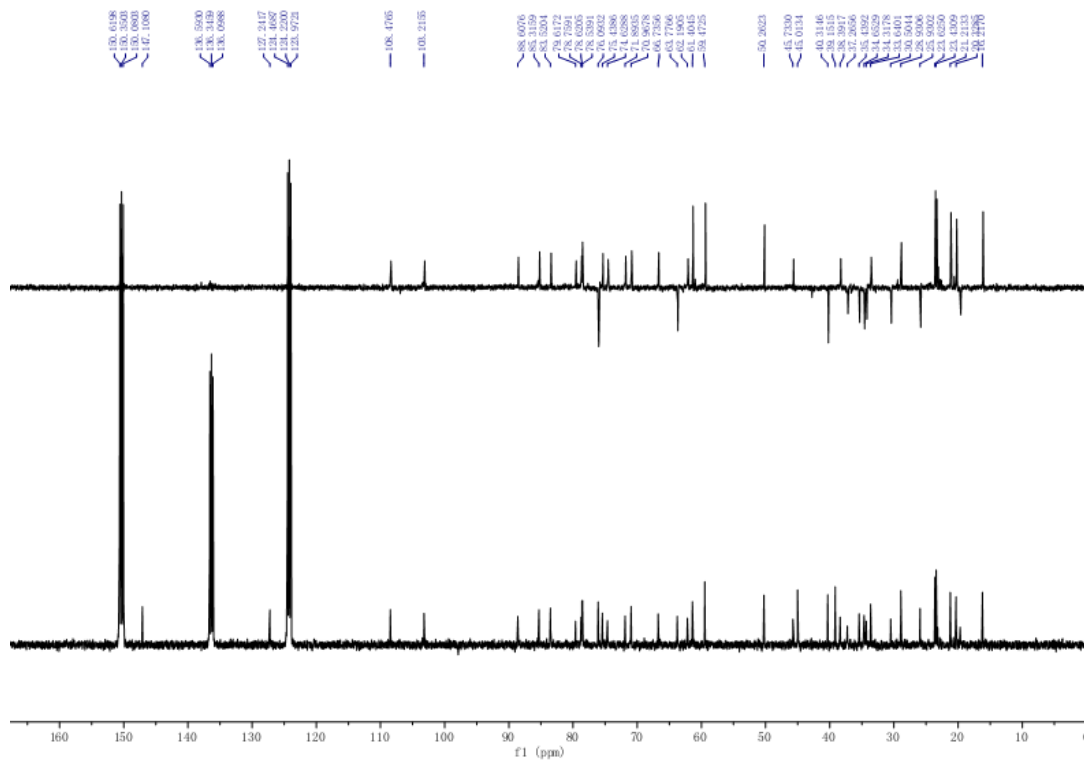

Figure S13. <sup>13</sup>C NMR and DEPT spectrum of hesperuside B (2) in pyridine-*d*<sub>5</sub>, 150MHz.

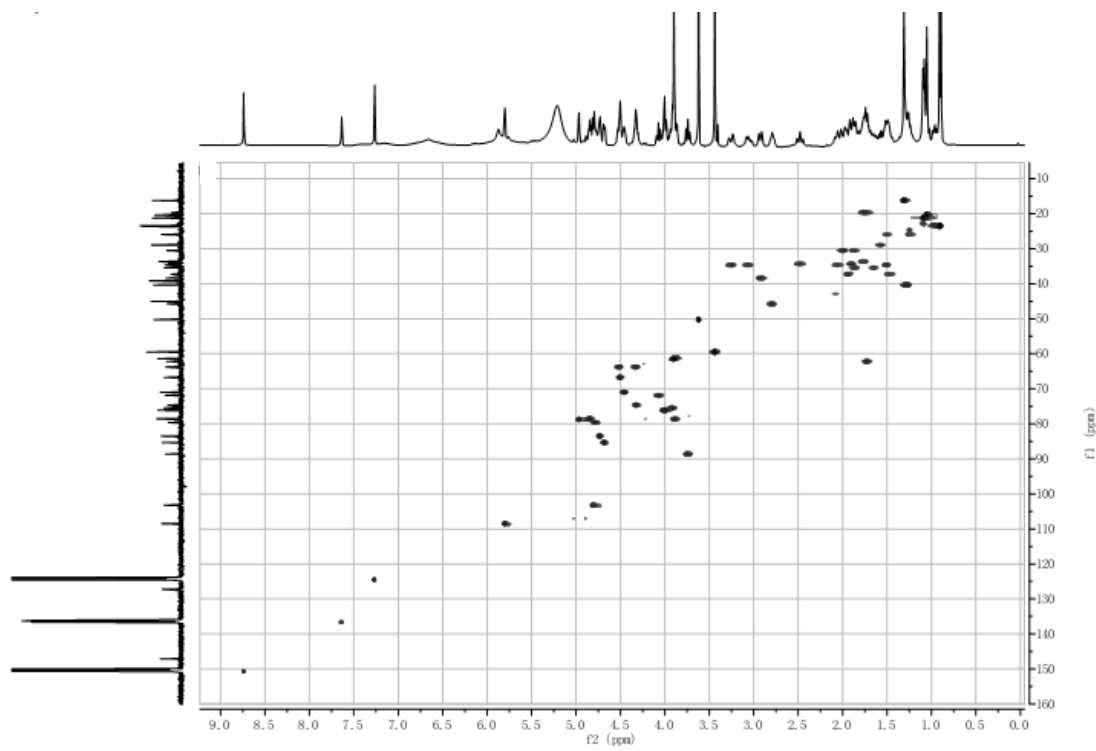

Figure S14. HMQC spectrum of hesperuside B (2).



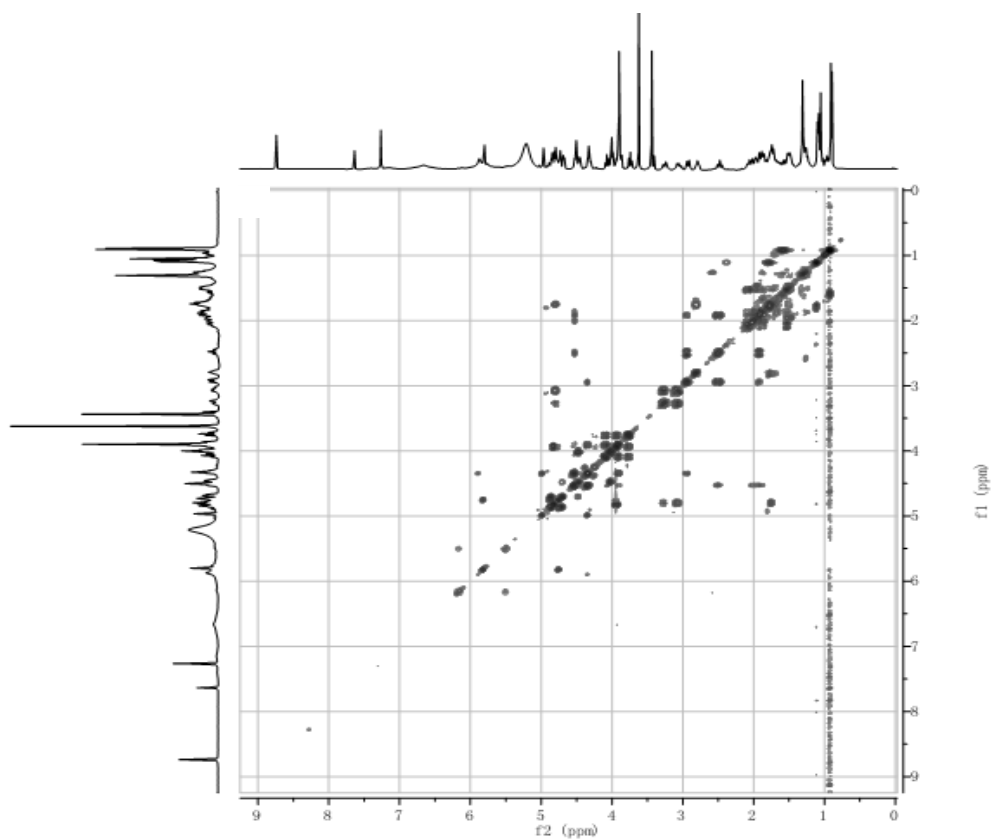

Figure S15.  $^1\text{H}$ - $^1\text{H}$  COSY spectrum of hesperuside B (2).

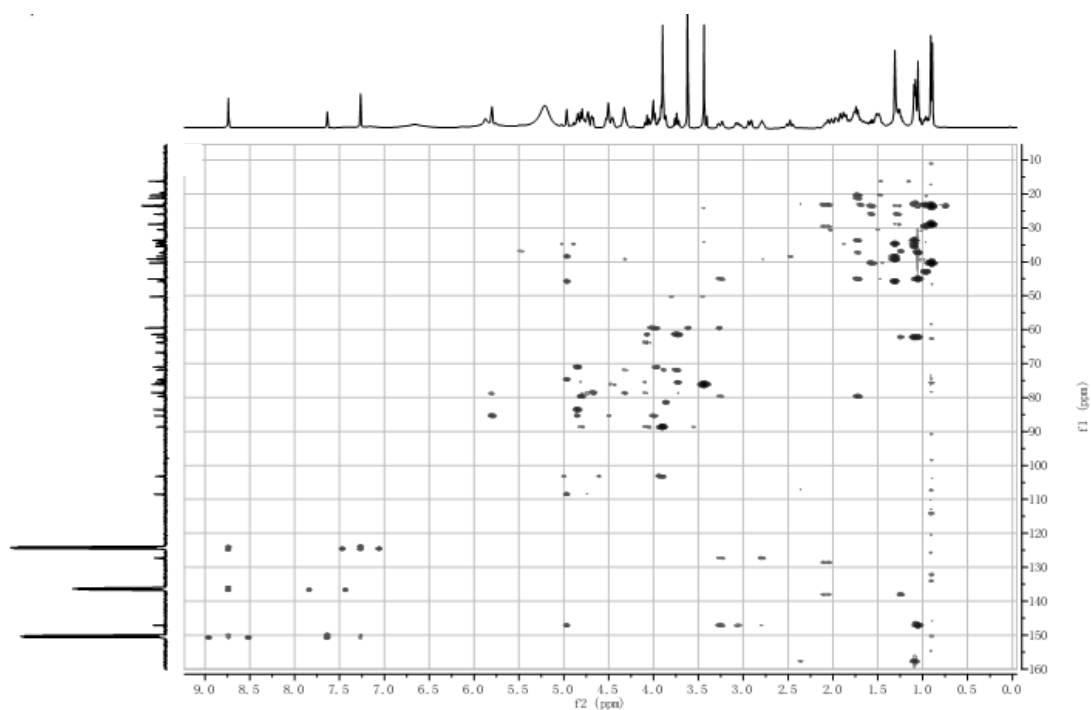

Figure S16. HMBC spectrum of hesperuside B (2).

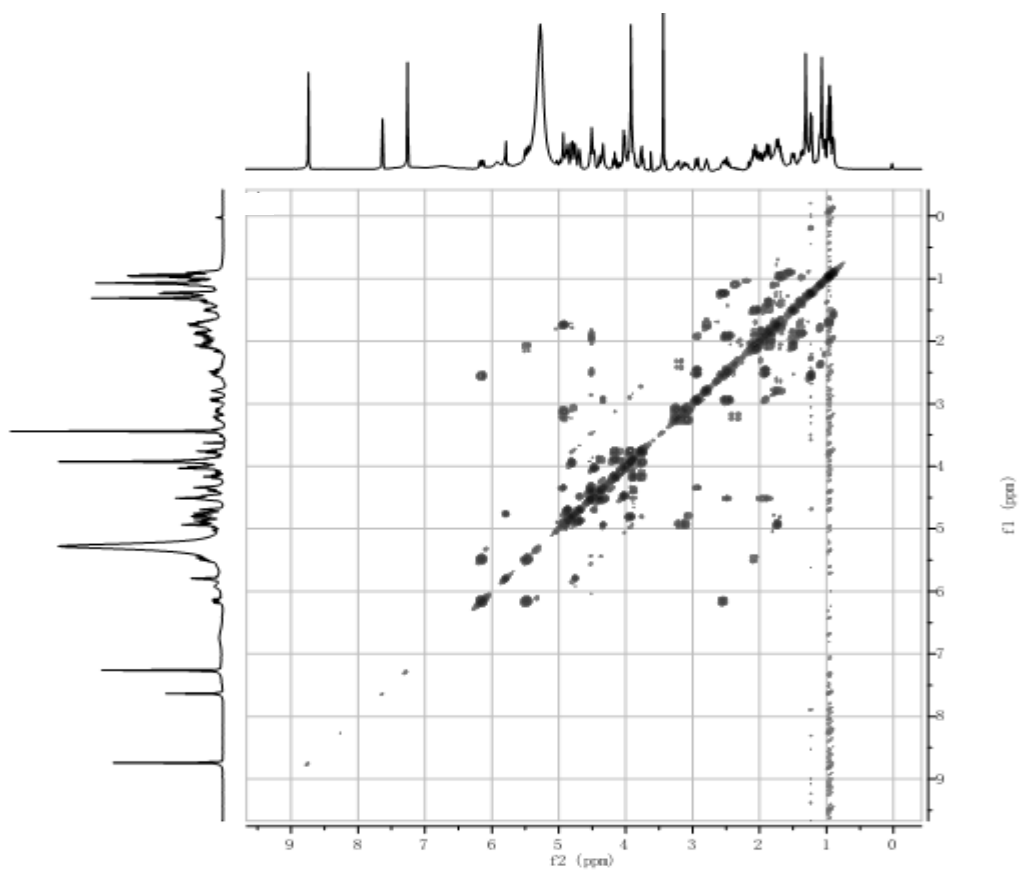

Figure S17. NOESY spectrum of hesperuside B (2).

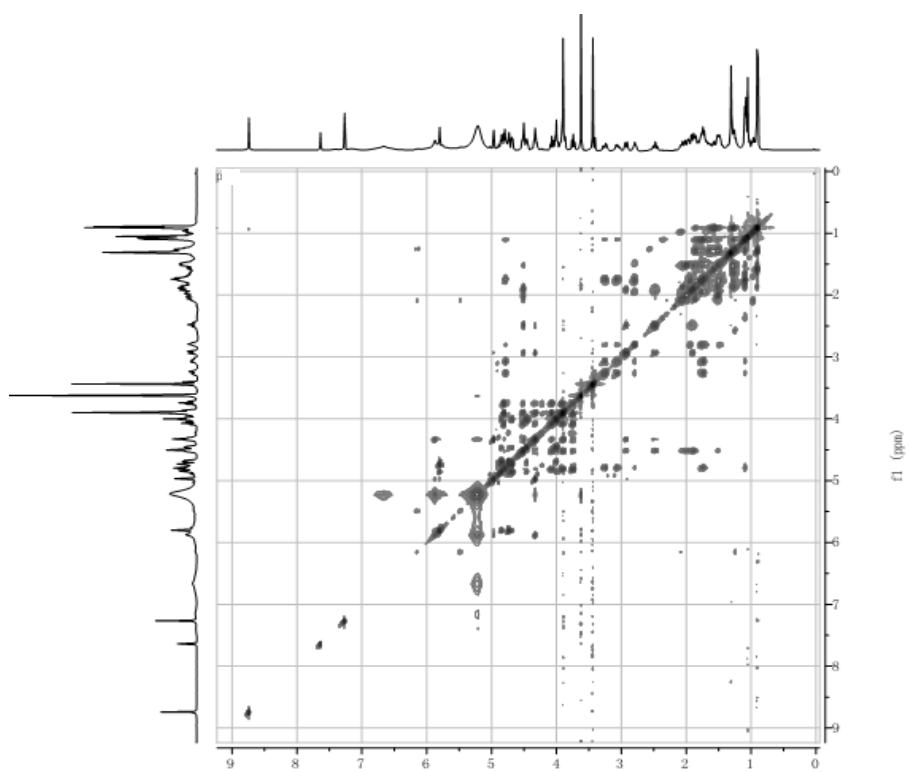

Figure S18. TOCSY spectrum of hesperuside B (2).

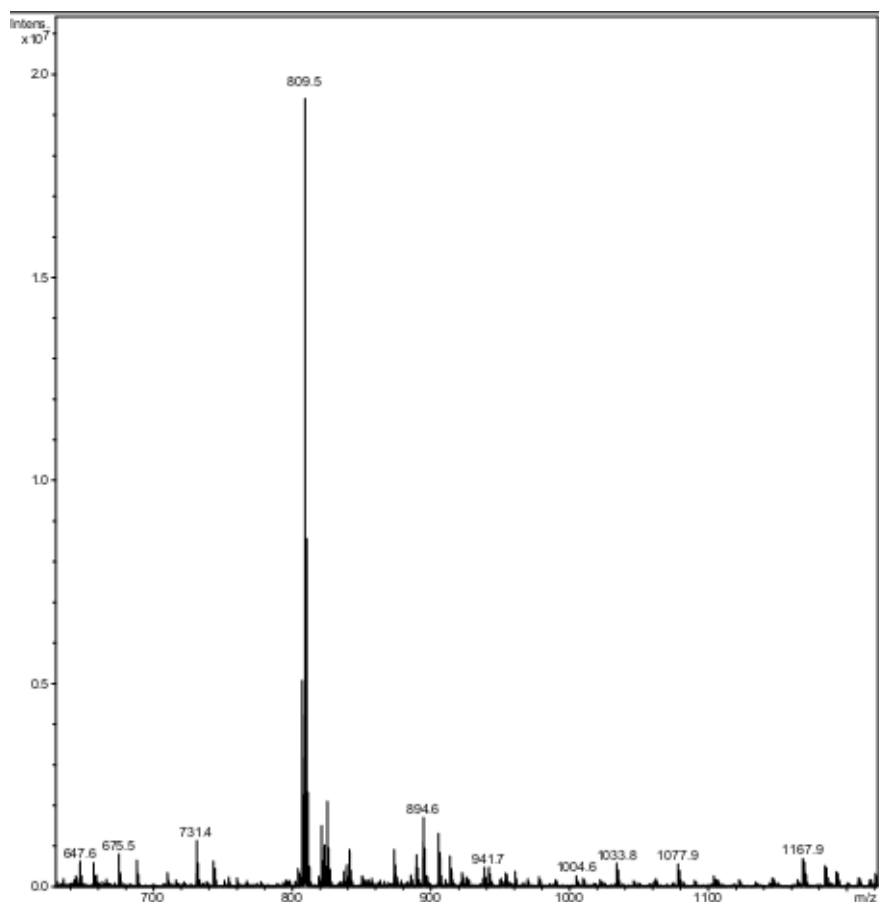

Figure S19. EI-MS spectrum of hesperuside B (2).

Ionization Mode ESI-Positive

Ion Mass (Measured) 809.46384

| Sum                    | Formula | Sigma | m/z       | Err [ppm] | Mean Err [ppm] | Err [mDa] | rdb   | N Rule | e <sup>-</sup> |
|------------------------|---------|-------|-----------|-----------|----------------|-----------|-------|--------|----------------|
| C 41 H 70 Na 1 O 14    |         | 0.010 | 809.46578 | 2.39      | 2.23           | 1.94      | 6.50  | ok     | even           |
| C 48 H 66 Na 1 O 9     |         | 0.049 | 809.45990 | -4.86     | -5.06          | -3.94     | 15.50 | ok     | even           |
| C 51 H 64 N 1 Na 1 O 6 |         | 0.068 | 809.46258 | -1.55     | -1.79          | -1.26     | 20.00 | ok     | odd            |
| C 54 H 62 N 2 Na 1 O 3 |         | 0.086 | 809.46526 | 1.76      | 1.48           | 1.42      | 24.50 | ok     | even           |

Figure S20. HR-EI-MS spectrum of hesperuside B (2).

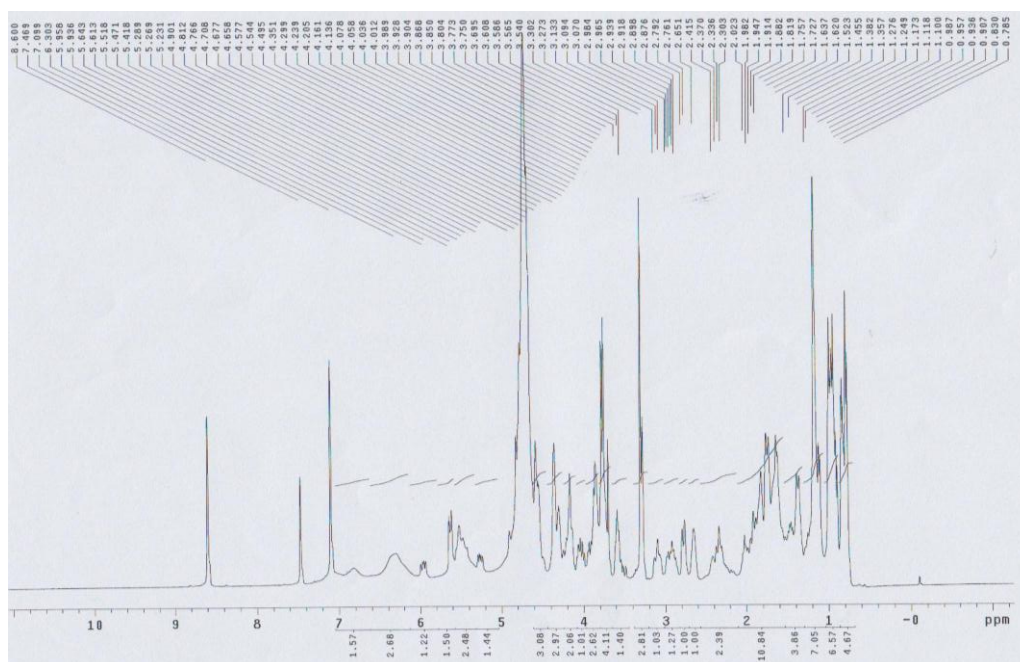

Figure S21. <sup>1</sup>H NMR spectrum of hesperuside C (3) in pyridine-*d*<sub>5</sub>, 600MHz.

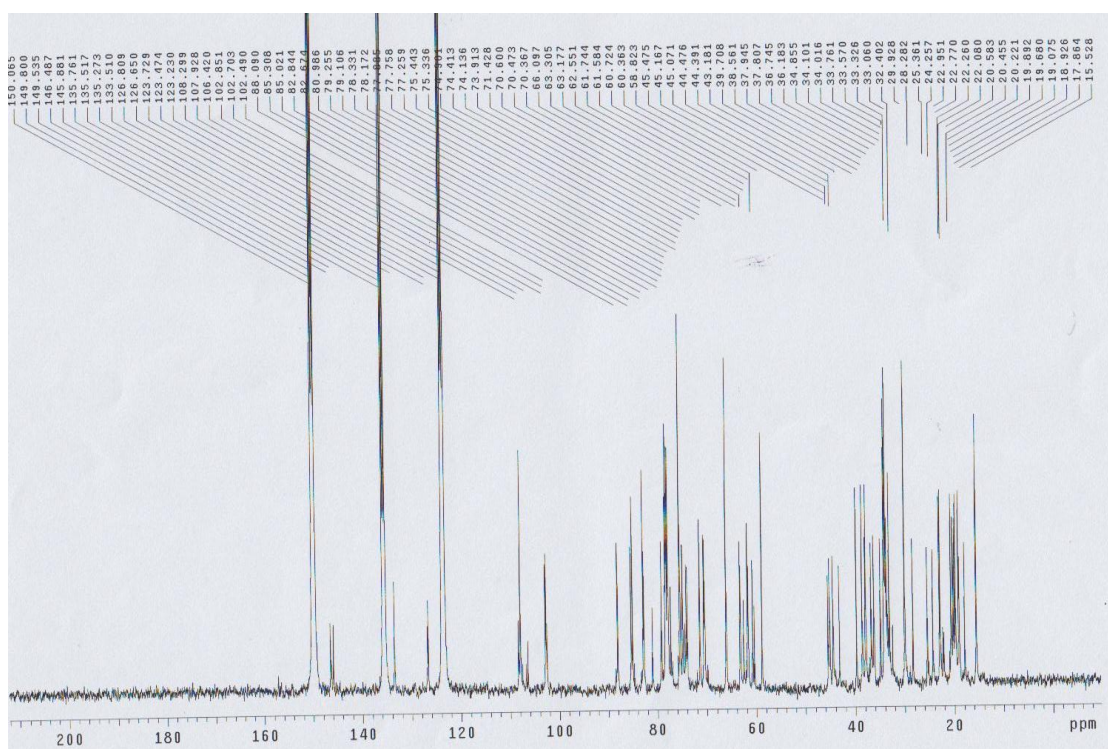

Figure S22. <sup>13</sup>C NMR spectrum of hesperuside C (3) in pyridine-*d*<sub>5</sub>, 150MHz.

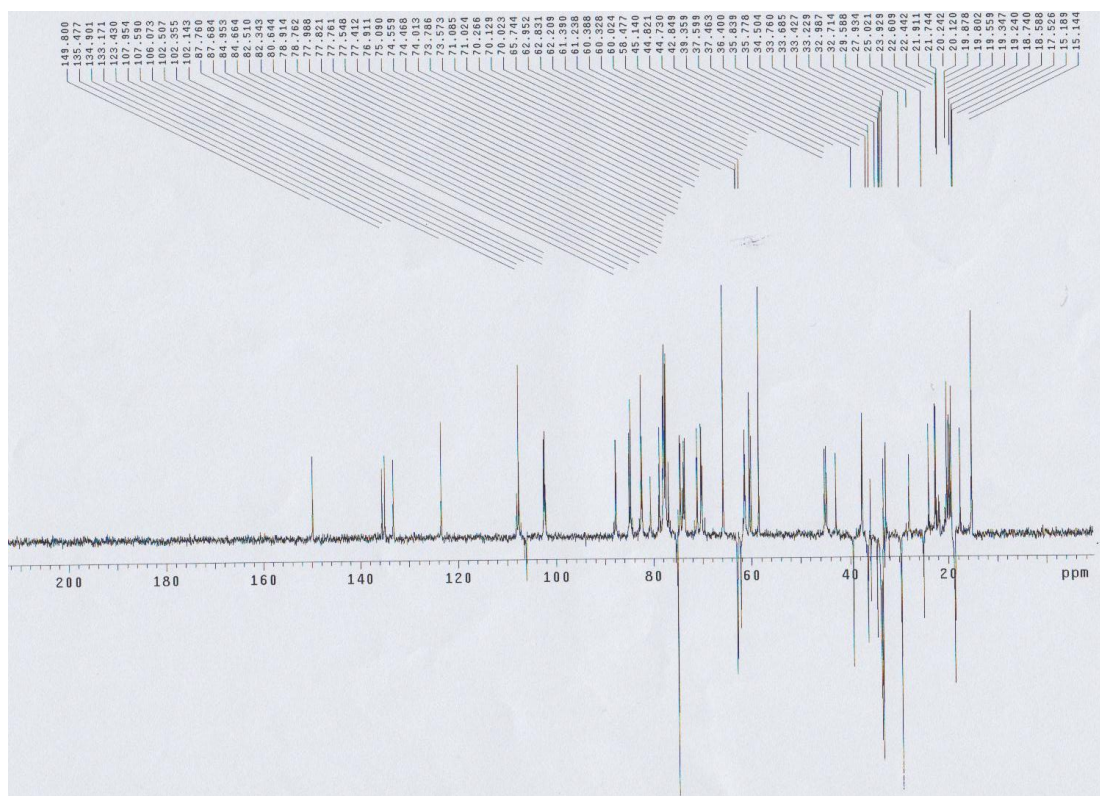

Figure S23. DEPT spectrum of hesperuside C (3).

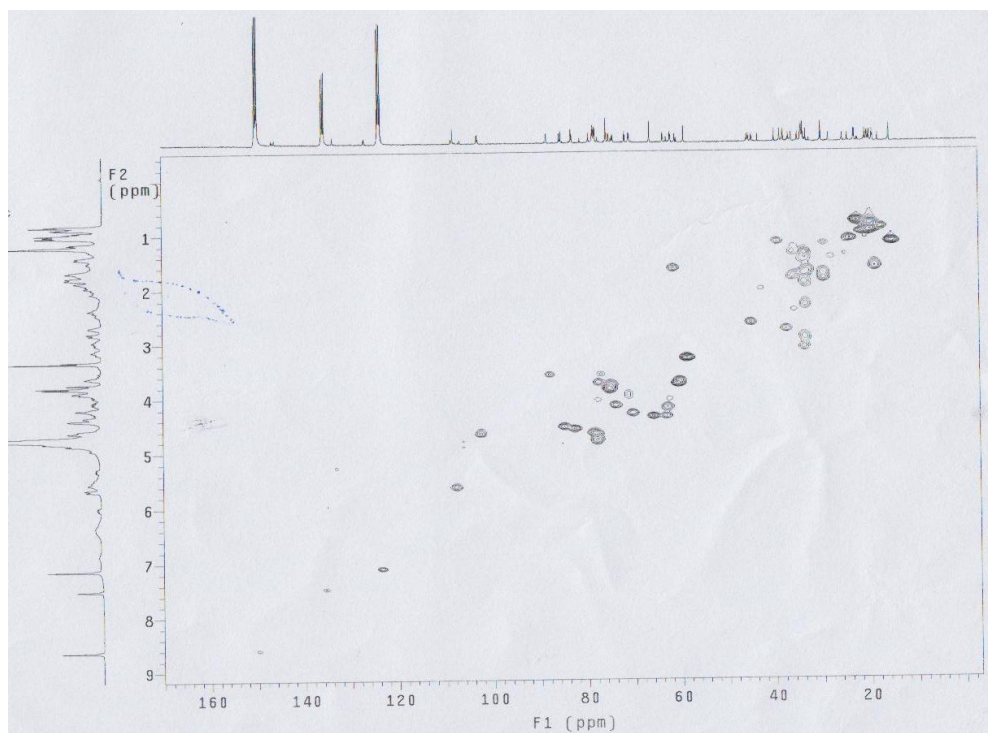

Figure S24. HMQC spectrum of hesperuside C (3).



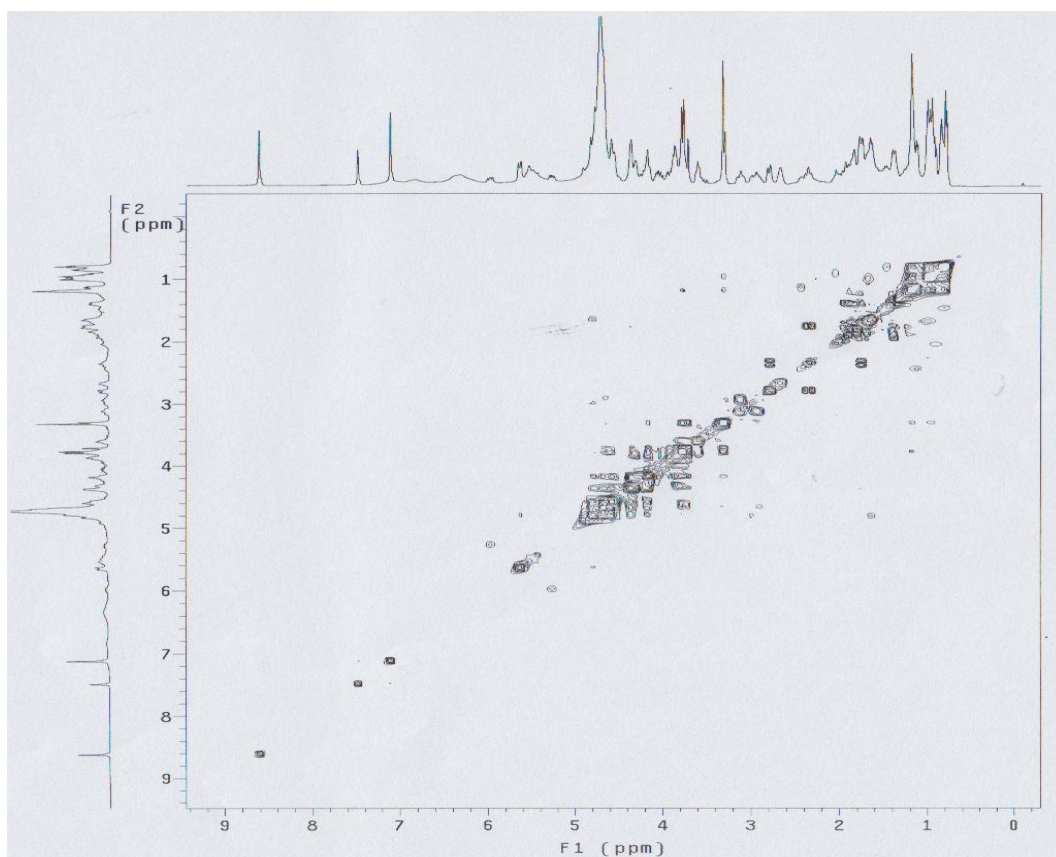

Figure S25. <sup>1</sup>H-<sup>1</sup>H COSY spectrum of hesperuside C (3).

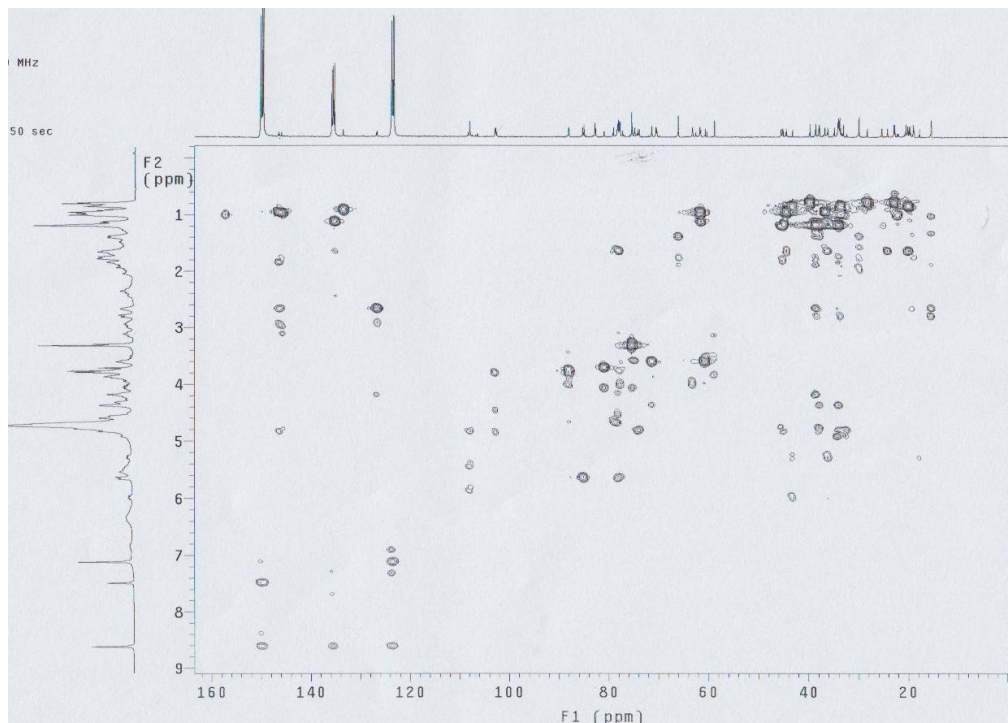

Figure S26. HMBC spectrum of hesperuside C (3).

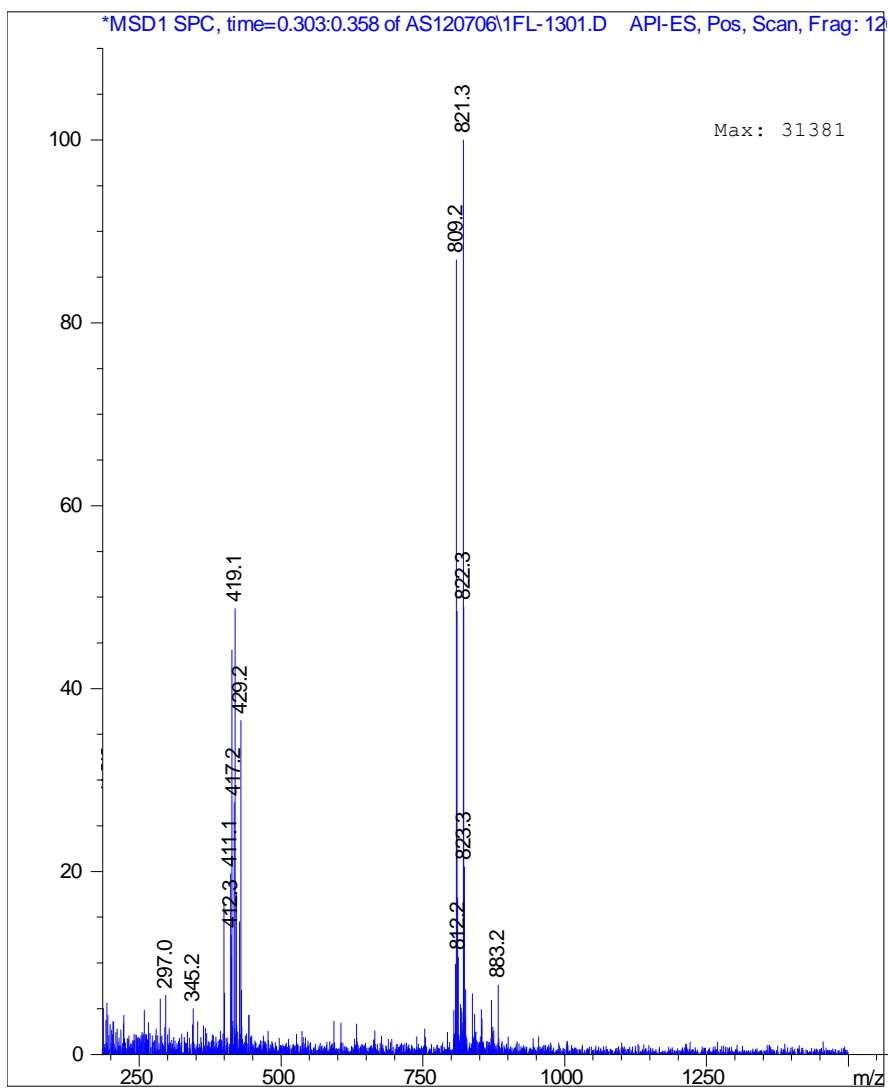

Figure S27. EI-MS spectrum of hesperuside C (3).
